# Supplementary material
Source: MDPI journal article supplement (https://www.mdpi.com/2227-7102/12/9/628)
Supplement: s1 [file s1 › education-1778962-supplementary.pdf]

**Supplementary Table S1.** Motivating factors, coding analysis of Group 2020.

| Coding Label                  | Explanation                                                                                                                         | Example Sentence                                                                                                                                                                                                                                                                                              | Women<br>(N=24)<br>N (%) | Men<br>(N=12)<br>N (%) | Total<br>(N=36)<br>N (%) | Comparison<br>by sex <i>P</i><br>(Effect size) |
|-------------------------------|-------------------------------------------------------------------------------------------------------------------------------------|---------------------------------------------------------------------------------------------------------------------------------------------------------------------------------------------------------------------------------------------------------------------------------------------------------------|--------------------------|------------------------|--------------------------|------------------------------------------------|
| <i>Save<sup>†</sup></i>       | Protect, help, benefit, save lives / people / the world (through medical science)                                                   | "I strongly felt that there is a need for medical science in society and that what I am learning will greatly help save lives."                                                                                                                                                                               | 12 (50)                  | 8 (66.8)               | 20 (55.5)                | 0.343 (0.478)                                  |
| <i>Knowledge<sup>†</sup></i>  | Frustrated by lack of knowledge / want to increase knowledge / skills / deepen understanding, responsibility / opportunity to study | "A few days ago, I was asked about medical terms. For example, the PCR test and the coronavirus and so on. However, I couldn't answer these questions completely. I didn't have enough knowledge. I was so frustrated by my lack of knowledges despite studying medical science."                             | 13 (54.1)                | 5 (41.6)               | 18 (50)                  | 0.48 (0.41)                                    |
| <i>Heroes<sup>†</sup></i>     | Recognized the importance of / respect for / feel proud of medical scientists / health care workers, heroes                         | "I believe that medical scientists will be heroes which eradicate COVID19 to protect people all over the world."                                                                                                                                                                                              | 12 (50)                  | 5 (41.6)               | 17 (47.2)                | 0.732 (0.288)                                  |
| <i>Truth<sup>†</sup></i>      | Importance of having / collecting / disseminating correct information / knowledge                                                   | "We can save the world by getting the right information out there. With this COVID19 pandemic, there was a lot of information about the COVID19 flying around. People were confused as to which was the correct information. By disseminating the right information, we can prevent the spread of infection." | 9 (37.5)                 | 4 (33.3)               | 13 (36.1)                | 0.553 (0.385)                                  |
| <i>Mission<sup>†</sup></i>    | Pandemic made me think about life / medicine / medical science / gave a sense of mission, responsibility                            | "COVID19 steals our daily life and this can't be ignored. Many people want the solution that protects themselves. Personally, in this situation, I feel that I have to solve this problem like the mission."                                                                                                  | 10 (41.6)                | 2 (16.6)               | 12 (33.3)                | 0.13 (0.595)                                   |
| <i>Contribute<sup>†</sup></i> | Contribute to / play my part in the development of medicine, medical science / improve COVID testing                                | "I think I should contribute to medical science as a medical science student in the future. Moreover, I especially want to contribute to making a new medicine in the future."                                                                                                                                | 5 (20.8)                 | 6 (50)                 | 11 (30.5)                | 0.073* (0.646)                                 |
| <i>Vaccine<sup>†</sup></i>    | No vaccine/cure has been found/want to create a vaccine/cure                                                                        | "If I study medical science, I will be able to develop a cure or a vaccine as a Medical scientist."                                                                                                                                                                                                           | 6 (25)                   | 3 (25)                 | 9 (25)                   | 0.61 (0.358)                                   |
| <i>Skills<sup>†</sup></i>     | Impressed that medical technologists' skill (PCR testing) is contributing to COVID prevention                                       | "Through the pandemic of COVID-19, I heard that medical scientists involve in PCR tests and help a lot of patients, so I felt that the job of medical scientists is attractive. Therefore, I was influenced by the COVID-19 and became more interested in becoming a medical scientist."                      | 3 (12.5)                 | 3 (25)                 | 6 (16.6)                 | 0.309 (0.494)                                  |

|                                                |                                                                                           |                                                                                                                                                                                                                                                                                                                  |          |          |          |                  |
|------------------------------------------------|-------------------------------------------------------------------------------------------|------------------------------------------------------------------------------------------------------------------------------------------------------------------------------------------------------------------------------------------------------------------------------------------------------------------|----------|----------|----------|------------------|
| <b><i>Solution</i></b>                         | Find solution for the pandemic / a future pandemic                                        | "If I continue studying medical science in my college, I may find some kind of solution for the next pandemic. So, I feel like the pandemic improve my motivation to study medical science."                                                                                                                     | 4 (16.6) | 1 (8.3)  | 5 (13.8) | 0.451<br>(0.444) |
| <b><i>Link<sup>†</sup></i></b>                 | Saw a link between pandemic and my studies                                                | "I felt the link between what I learned and what is happening."                                                                                                                                                                                                                                                  | 1 (4.1)  | 3 (25)   | 4 (11.1) | 0.098<br>(0.621) |
| <b><i>Research<sup>†</sup></i></b>             | Became interested in medical science / virology / infection biology / new research fields | "After experiencing the current situation, I became interested in research."                                                                                                                                                                                                                                     | 1 (4.1)  | 1 (8.3)  | 2 (5.5)  | 0.55<br>(0.387)  |
| <b><i>Online Good</i></b>                      | Online classes are good / have benefits / less commuting time                             | "I am able to make good use of my time because of online lectures."                                                                                                                                                                                                                                              | 0 (0)    | 2 (16.6) | 2 (5.5)  | 0.105<br>(0.615) |
| <b><i>Vision<sup>†</sup></i></b>               | Can visualize/have an image of the work of a medical technologist / vision for the future | "I got to catch the image of medical technologist."                                                                                                                                                                                                                                                              | 0 (0)    | 1 (8.3)  | 1 (2.7)  | 0.324<br>(0.487) |
| <b><i>Success<sup>†</sup></i></b>              | Achieve success                                                                           | "I feel the need to study harder to succeed as a medical researcher."                                                                                                                                                                                                                                            | 1 (4.1)  | 0 (0)    | 1 (2.7)  | 0.676<br>(0.323) |
| <b><i>Developing Countries<sup>†</sup></i></b> | Want to contribute to those in developing countries                                       | "My dream is to provide medical assistance to least developed countries."                                                                                                                                                                                                                                        | 1 (4.1)  | 0 (0)    | 1 (2.7)  | 0.676<br>(0.323) |
| <b><i>Challenges<sup>†</sup></i></b>           | Become a person who stands up to challenges                                               | "Through this COVID19 pandemic, I strongly want to be a medical technologist that stands up to the challenge of even the most difficult situations."                                                                                                                                                             | 1 (4.1)  | 0 (0)    | 1 (2.7)  | 0.676<br>(0.323) |
| <b><i>Career<sup>†</sup></i></b>               | Medical science work offers a stable future / will be needed more in the future           | "Thanks to COVID19, pathogenic microbiology is possibly the area of research that people are most interested in right now. If this happens to continue, being a medical researcher would be a stable option for my future. This is how the pandemic has made me more optimistic about studying medical science." | 1 (4.1)  | 0 (0)    | 1 (2.7)  | 0.676<br>(0.323) |

<sup>†</sup>Indicates medical science-specific coding labels

\*Indicates statistically significant P-values

**Supplementary Table S2.** Demotivating factors, coding analysis of Group 2020.

| <b>Coding Label</b>               | <b>Explanation</b>                                                                       | <b>Example Sentence</b>                                                                                                                                                                                                                        | <b>Women<br/>(N=24)<br/>N (%)</b> | <b>Men<br/>(N=12)<br/>N (%)</b> | <b>Total<br/>(N=36)<br/>N (%)</b> | <b>Comparison<br/>by sex <i>P</i><br/>(Effect size)</b> |
|-----------------------------------|------------------------------------------------------------------------------------------|------------------------------------------------------------------------------------------------------------------------------------------------------------------------------------------------------------------------------------------------|-----------------------------------|---------------------------------|-----------------------------------|---------------------------------------------------------|
| <i>Lonely</i>                     | Feeling lonely / can't meet friends / family                                             | "I feel loneliness in my house every day because I can't talk with friends directly, study with them and go to anywhere.                                                                                                                       | 1 (4.1)                           | 3 (25)                          | 4 (11.1)                          | 0.35<br>(0.47)                                          |
| <i>Discrimination<sup>†</sup></i> | Demotivated / angry about by discriminatory attitudes towards patients and doctors       | "I am very reluctant to see medical professionals discriminated against because of COVID-19 pandemic, and I am very afraid of this kind of fact."                                                                                              | 2 (8.3)                           | 1 (8.3)                         | 3 (8.3)                           | 0.098<br>(0.621)                                        |
| <i>No Experiments<sup>†</sup></i> | Demotivated to study because cannot do experiments / practical training / develop skills | "We cannot do some experiments at the college."                                                                                                                                                                                                | 2 (8.3)                           | 1 (8.3)                         | 3 (8.3)                           | 0.704<br>(0.306)                                        |
| <i>Online Bad</i>                 | Online Classes / lectures are boring / bad / have more disadvantages than advantages     | "Online learning has more disadvantages than advantages. First, it's stress that I don't meet my friends and teachers. Second, the things we can get is less than those of face-to-face classes. Third, my eyes and ears have a heavy burden." | 1 (4.1)                           | 2 (16.6)                        | 3 (8.3)                           | 0.704<br>(0.306)                                        |
| <i>Government</i>                 | Demotivated / frustrated by government response                                          | "My motivation to study decreased because of the government's delay in dealing with health care workers."                                                                                                                                      | 2 (8.3)                           | 0 (0)                           | 2 (5.5)                           | 0.253<br>(0.521)                                        |
| <i>Robbed</i>                     | COVID robs me of my time / memories / good times                                         | "COVID19 has taken much time from us. Especially, our chances to go out and the memories that we make are reduced."                                                                                                                            | 1 (4.1)                           | 1 (8.3)                         | 2 (5.5)                           | 0.45<br>(0.431)                                         |
| <i>Screens</i>                    | Tired of looking at the screen                                                           | "I can't go to university, and have to take online lessons. I'm too tired to watch a desktop screen all the day."                                                                                                                              | 1 (4.1)                           | 1 (8.3)                         | 2 (5.5)                           | 0.55<br>(0.387)                                         |
| <i>Being Home</i>                 | Slacked off / boring / obstacles at home                                                 | "The spread of coronaviruses has plagued people around the world with anxiety and fear, causing various obstacles at home"                                                                                                                     | 1 (4.1)                           | 0 (0)                           | 1 (2.7)                           | 0.55<br>(0.387)                                         |

<sup>†</sup>Indicates medical science-specific coding labels

\*Indicates statistically significant P-values

**Supplementary Table S3.** Motivating factors, coding analysis of Group 2021.

| Coding Label                        | Explanation                                                                                            | Example Sentence                                                                                                                                                                                                                                                                 | Women<br>(N=25)<br>N (%) | Men<br>(N=12)<br>N (%) | Total<br>(N=37)<br>N (%) | Comparison<br>by sex <i>P</i><br>(Effect size) |
|-------------------------------------|--------------------------------------------------------------------------------------------------------|----------------------------------------------------------------------------------------------------------------------------------------------------------------------------------------------------------------------------------------------------------------------------------|--------------------------|------------------------|--------------------------|------------------------------------------------|
| <i>Save<sup>†</sup></i>             | Protect, help, benefit, save lives / people / the world (through medical science)                      | "Through the pandemic, I felt that the medical science I was studying could save lives."                                                                                                                                                                                         | 8 (32)                   | 3 (25)                 | 11 (29.7)                | 0.487<br>(0.409)                               |
| <i>Truth<sup>†</sup></i>            | Importance of having / collecting / disseminating correct information / knowledge                      | "We are in the midst of a pandemic in the Internet age, a situation of unprecedented information overload, and it is important to be able to discern what is correct and what is fake."                                                                                          | 6 (24)                   | 3 (25)                 | 9 (24.3)                 | 0.624<br>(0.346)                               |
| <i>Research<sup>†</sup></i>         | Became interested in medical science / virology / infection biology / new research fields              | "I started to take a new interest in research fields related to COVID-19. Until now, I was not very interested in the fields of virology and drug discovery, but I became interested in this situation."                                                                         | 5 (20)                   | 4 (33.3)               | 9 (24.3)                 | 0.311<br>(0.486)                               |
| <i>Value of Studies<sup>†</sup></i> | Saw the value / meaning / importance / duty of medical science studies                                 | "Through the pandemic, I felt that the medical science I was studying could save lives. As a result, I realized that the medical science was useful, and motivated me to study."                                                                                                 | 6 (24)                   | 3 (25)                 | 9 (24.3)                 | 0.624<br>(0.346)                               |
| <i>Contribute<sup>†</sup></i>       | Contribute to / play my part in / the development of medicine, medical science / improve COVID testing | "If I can do research to overcome a pandemic, I can contribute to the medical field. As a medical science student, I want to be a useful person, and I am studying with high motivation."                                                                                        | 5 (20)                   | 2 (16.6)               | 7 (18.9)                 | 0.594<br>(0.361)                               |
| <i>Communication</i>                | Realized the importance of communicating / relationships with friends                                  | "This situation of pandemic taught me that the communication gives us the meaning of study and motivation."                                                                                                                                                                      | 4 (16)                   | 2 (16.6)               | 6 (16.2)                 | 0.65<br>(0.333)                                |
| <i>Protection<sup>†</sup></i>       | Realized the importance of protecting myself / doing what I can to curb the pandemic                   | "I think our individual actions can curb infection, so we should focus our attention on the topic of COVID-19 and take action."                                                                                                                                                  | 3 (12)                   | 2 (16.6)               | 5 (13.5)                 | 0.53<br>(0.390)                                |
| <i>Link<sup>†</sup></i>             | Saw a link between pandemic and my studies                                                             | "When studying medical science, the examples related to the current situation are very helpful. For instance, today the COVID-19 vaccine is a hot topic in the world and now I'm studying microbiology, so I can learn action mechanism of vaccine with very familiar examples." | 4 (16)                   | 0 (0)                  | 4 (10.8)                 | 0.192<br>(0.546)                               |
| <i>Time</i>                         | Had time to reflect on my future                                                                       | "I had more time to be alone during the self-restraint period, so I could spend enough time facing myself. At that time, I began to think about the                                                                                                                              | 2 (8)                    | 1 (8.3)                | 3 (8.1)                  | 0.704<br>(0.302)                               |

|                                         |                                                                                                       |                                                                                                                                                                           |        |          |         |                   |
|-----------------------------------------|-------------------------------------------------------------------------------------------------------|---------------------------------------------------------------------------------------------------------------------------------------------------------------------------|--------|----------|---------|-------------------|
|                                         |                                                                                                       | future and it made me more motivated to study medical science.”                                                                                                           |        |          |         |                   |
| <i>Media Good</i>                       | Watching the news/TV about COVID/medical field                                                        | “In the mass media, such as television, I have more opportunities to see the actual medical field, and I was more motivated to study.”                                    | 3 (12) | 0 (0)    | 3 (8.1) | 0.296<br>(0.493)  |
| <i>Heroes<sup>†</sup></i>               | Recognized the importance of/respect for/feel proud of medical scientists/health care workers, heroes | “COVID-19 makes me feel more thankful to health care professionals and motivated to study medical science.”                                                               | 3 (12) | 0 (0)    | 3 (8.1) | 0.296<br>(0.493)  |
| <i>Innovation<sup>†</sup></i>           | Impressed by advances in medical technology/vaccines                                                  | “I had always understood that medical technology was advancing day by day, but I was reminded of how amazing it was.”                                                     | 0 (0)  | 3 (25)   | 3 (8.1) | 0.046*<br>(0.673) |
| <i>In-person Classes</i>                | More face-to-face classes/in-person activities has increased motivation                               | “Recently, the number of face-to-face classes has increased little by little, and I made new friends of university, so I have been able to keep my motivation somehow.”   | 0 (0)  | 2 (16.6) | 2 (5.4) | 0.099<br>(0.612)  |
| <i>Shortage<sup>†</sup></i>             | Shortage of medical workers                                                                           | “There is a serious problem, which is a lack of medical staff. Despite the large number of people who are waiting for treatment, the number of medical workers is a few.” | 2 (8)  | 0 (0)    | 2 (5.4) | 0.45<br>(0.425)   |
| <i>Developing Countries<sup>†</sup></i> | Help people in poor/developing countries                                                              | “In developing countries, many people die of infection, so I thought that I want to solve this problem by studying infection and developing a new vaccine or medicine.”   | 1 (4)  | 1 (8.3)  | 2 (5.4) | 0.55<br>(0.381)   |
| <i>Online Good</i>                      | Online classes are good/have benefits/less commuting time                                             | “The on-demand format of the class allowed me to attend lectures at my own pace and deepen my understanding.”                                                             | 0      | 1 (8.3)  | 1 (2.7) | 0.324<br>(0.480)  |
| <i>Determined<sup>†</sup></i>           | COVID made me more determined to become a medical technologist                                        | “The COVID-19 pandemic made me determined to become medical lab technologist.”                                                                                            | 1 (4)  | 0 (0)    | 1 (2.7) | 0.676<br>(0.319)  |
| <i>Vision<sup>†</sup></i>               | Can visualize the work (image) of a medical technologist/vision for the future                        | “The COVID-19 pandemic taught me what medical technologists do for their job.”                                                                                            | 1 (4)  | 0 (0)    | 1 (2.7) | (0.676)<br>0.319  |

<sup>†</sup>Indicates medical science-specific coding labels

\*Indicates statistically significant P-values

**Supplementary Table S4.** Demotivating factors, coding analysis of Group 2021.

| Coding Label                      | Explanation                                                                              | Example Sentence                                                                                                                                                                                                                                                                                                           | Women<br>(N=25)<br>N (%) | Men<br>(N=12)<br>N (%) | Total<br>(N=37)<br>N (%) | Comparison<br>by sex <i>P</i><br>(Effect size) |
|-----------------------------------|------------------------------------------------------------------------------------------|----------------------------------------------------------------------------------------------------------------------------------------------------------------------------------------------------------------------------------------------------------------------------------------------------------------------------|--------------------------|------------------------|--------------------------|------------------------------------------------|
| <i>Online Bad</i>                 | Online Classes / lectures are boring / bad/ have more disadvantages than advantages      | "I feel that the prevalence of COVID-19 has discouraged me from learning. This is because I have not been able to take advantage of the various opportunities to gain knowledge in the medical field and because the format of online lessons does not suit me."                                                           | 6 (24)                   | 4 (33.3)               | 10 (27)                  | 0.412<br>(0.442)                               |
| <i>Robbed</i>                     | Covid robbed me of my college life / events / experiences                                | "COVID-19 has robbed our precious college life."                                                                                                                                                                                                                                                                           | 7 (28)                   | 2 (16.6)               | 9 (24.3)                 | 0.376<br>(0.457)                               |
| <i>Discrimination<sup>†</sup></i> | Demotivated / angry about by discriminatory attitudes towards patients and doctors       | "At the beginning of the pandemic, health workers were discriminated against because they had many chances of infecting COVID-19."                                                                                                                                                                                         | 4 (16)                   | 0 (0)                  | 4 (10.8)                 | 0.192<br>(0.546)                               |
| <i>Negative Emotions</i>          | I feel anxious / sad / worried/ fearful / scared / danger / helpless                     | "The COVID-19 pandemic causes me much stress and it is difficult to keep myself motivated to study. This is because I am not satisfied with my life, and because I am feeling anxious about several years down the road."                                                                                                  | 3 (12)                   | 0 (0)                  | 3 (8.1)                  | 0.296<br>(0.493)                               |
| <i>Lack of Vision</i>             | No clear idea / aspirations / anxious for the future                                     | "I cannot have clear aspiration in my life and am worried about the future."                                                                                                                                                                                                                                               | 3 (12)                   | 0 (0)                  | 3 (8.1)                  | 0.296<br>(0.493)                               |
| <i>Being Home</i>                 | Slacked off/boring at home                                                               | "During the time when I refrained from going out, I slacked off at home and didn't have much motivation to study."                                                                                                                                                                                                         | 2 (8)                    | 1 (8.3)                | 3 (8.1)                  | 0.704<br>(0.302)                               |
| <i>Lonely</i>                     | Feeling lonely / can't meet friends / family                                             | "I felt lonely and my motivation for study became less and less."                                                                                                                                                                                                                                                          | 2 (8)                    | 0 (0)                  | 2 (5.4)                  | 0.45<br>(0.425)                                |
| <i>No Experiments<sup>†</sup></i> | Demotivated to study because cannot do experiments / practical training / develop skills | "I cannot get a lot of skills like communication skill and practical skill."                                                                                                                                                                                                                                               | 2 (8)                    | 0 (0)                  | 2 (5.4)                  | 0.45<br>(0.425)                                |
| <i>Mask</i>                       | Wearing a mask is hard                                                                   | "Putting on a mask all day long is hard. This is because, I have naturally sensitive skin."                                                                                                                                                                                                                                | 1 (4)                    | 0 (0)                  | 1 (2.7)                  | 0.676<br>(0.319)                               |
| <i>Media Bad</i>                  | Watching the news made me anxious                                                        | "Seeing the severe situation in the medical field through reports related to COVID-19 on TV and the Internet, and learning about the unfair discrimination against medical professionals in the world through social networking sites, I began to feel vague anxiety about becoming a medical professional in the future." | 1 (4)                    | 0 (0)                  | 1 (2.7)                  | 0.676<br>(0.319)                               |

<sup>†</sup>Indicates medical science-specific coding labels

\*Indicates statistically significant *P*-values
